# Supplementary material for: Twice-Daily versus Once-Daily Pramipexole Extended Release Dosage Regimens in Parkinson's Disease
Source: PubMed Central journal article supplement (PMC5318624; doi:10.1155/2017/8518929), 2017-02-07
Supplement: 8518929.f1.pdf [file 8518929.f1.pdf]

**Supplementary table e-1.** Comparisons of baseline characteristics between the patients who chose once-daily regimens and twice- daily after the trial.

| N = 39                                                            | QD (N = 14)   | BID (N = 25)  | <i>P</i> Value     |
|-------------------------------------------------------------------|---------------|---------------|--------------------|
| Age (years)                                                       | 58.0 ± 11.6   | 61.1 ± 7.1    | 0.792              |
| Disease duration                                                  | 7.7 ± 5.9     | 11.2 ± 4.9    | 0.005 <sup>a</sup> |
| Sex (M:F)                                                         | 5:9           | 11:14         | 0.637              |
| mUPDRS                                                            | 18.8 ± 10.1   | 19.0 ± 6.5    | 0.792              |
| Hoehn and Yahr stage                                              | 1.9 ± 0.6     | 2.1 ± 0.4     | 0.157              |
| Pramipexole ER dose after titration                               | 2.0 ± 1.0     | 2.7 ± 1.3     | 0.137              |
| LEDD                                                              | 966.3 ± 330.8 | 970.1 ± 256.3 | 0.638              |
| Epworth Sleep Scale                                               | 3.2 ± 2.0     | 5.4 ± 3.3     | 0.039 <sup>a</sup> |
| <b>PDSS</b>                                                       |               |               |                    |
| Overall sleep quality                                             | 7.8 ± 2.2     | 7.1 ± 2.2     | 0.332              |
| Falling in sleep                                                  | 8.4 ± 3.5     | 8.4 ± 2.2     | 0.285              |
| Staying asleep                                                    | 7.1 ± 4.1     | 4.5 ± 4.1     | 0.042 <sup>a</sup> |
| Sleep disruption due to restlessness of limbs at night or evening | 8.3 ± 3.2     | 8.3 ± 2.7     | 0.767              |
| Fidget in bed                                                     | 8.0 ± 3.1     | 8.4 ± 2.9     | 0.474              |
| Distressing dreams at night                                       | 8.3 ± 3.6     | 7.9 ± 3.3     | 0.599              |
| Distressing hallucination at night                                | 9.3 ± 2.0     | 9.1 ± 2.3     | 0.481              |
| Getting up at night to pass urine                                 | 6.3 ± 3.8     | 3.8 ± 4.1     | 0.035              |
| Incontinence due to off symptoms                                  | 10.0 ± 0.0    | 10.0 ± 0.0    | 1.000              |
| Numbness or tingling of limbs                                     | 7.5 ± 3.5     | 8.9 ± 2.3     | 0.133              |
| Painful muscle cramps                                             | 9.4 ± 1.2     | 8.4 ± 2.9     | 0.591              |
| Wake early in the morning with painful posturing of limbs         | 9.8 ± 0.7     | 9.5 ± 1.6     | 0.656              |
| On waking tremor                                                  | 7.6 ± 4.0     | 9.3 ± 2.2     | 0.068              |
| Morning tiredness or sleepiness                                   | 9.1 ± 2.7     | 7.5 ± 3.8     | 0.119              |
| Unexpected falling asleep in the day                              | 9.7 ± 0.7     | 8.1 ± 3.0     | 0.073              |
| Total PDSS                                                        | 126.5 ± 23.0  | 119.3 ± 20.0  | 0.208              |
| VAS for wearing off-duration                                      | 2.0 ± 1.1     | 2.7 ± 1.3     | 0.115              |
| VAS for wearing off-severity                                      | 6.6 ± 2.1     | 5.8 ± 2.2     | 0.288              |

|                             |           |           |       |
|-----------------------------|-----------|-----------|-------|
| VAS for dyskinesia-duration | 9.4 ± 0.7 | 8.6 ± 1.8 | 0.291 |
| VAS for dyskinesia-severity | 8.5 ± 1.8 | 8.3 ± 2.2 | 0.975 |

<sup>a</sup>*P* < 0.05

QD, Once-daily; BID, Twice-daily; mUPDRS, Unified Parkinson's Disease Rating Scale part 3; ER, extended-release; LEDD, levodopa equivalent dose; VAS, visual analogue scale; PDSS, Parkinson's disease sleep scale.
